# Supplementary material
Source: publisher site journal article supplement (https://www.degruyterbrill.com/publication/isbn/9783110410372/downloadAsset/9783110410372_Inhalt.pdf)
Supplement: Supplementary file 1 [file 9783110410372_Inhalt.pdf]

# Inhalt

## Vorwort — VII

### 1 Einleitung — 1

### 2 Gesellschaftsbilder – Definition und Diskurs — 9

- 2.1 „Staat ohne geistigen Schatten“ — 15
- 2.2 Kollektive Ideale im Liberalismus — 18
- 2.3 Zwischen Subjektivität und Gemeinwohl — 21
- 2.4 Das Ende der Geschichte? — 23
- 2.5 Das Gemeinwohl als Zentrum „sozialmoralischer Orientierung“ — 25
- 2.5.1 Der Bundesverband der Deutschen Industrie — 32
- 2.5.2 Die Industriegewerkschaft Metall — 33
- 2.5.3 Die Aktion Mensch und die deutschen Wohlfahrtsverbände — 34
- 2.6 Zwischenfazit Gesellschaftsbilder — 36

### 3 Kampagnen als interdisziplinärer Forschungsgegenstand — 39

- 3.1 Definition und interdisziplinäre Perspektiven — 40
- 3.2 Public Relations als ‚Gesellschaftserzählungen‘ — 45
- 3.3 Kampagnen als Text — 49
- 3.4 Zwischenfazit: Kampagnen aus linguistischer Perspektive — 55

### 4 Sprachwissenschaft als Wirklichkeitswissenschaft — 59

- 4.1 Wissen als pragmasemantischer Untersuchungsgegenstand — 63
- 4.2 Wissen und Bedeutung — 69
- 4.3 Diskurssemantik — 71
- 4.4 Das Kampagnenkorporus als Diskursausschnitt — 74

### 5 Von punktuell zu flächig – Methodische Überlegungen — 79

- 5.1 Untersuchungen auf lexikalischer Ebene — 80
- 5.1.1 Der ‚Kampf um Wörter‘ — 80
- 5.1.2 Deontische Bedeutungen — 83
- 5.1.3 Schlagwörter — 85
- 5.1.4 Fahnen- und Stigmawörter — 89
- 5.1.5 Metaphern — 90
- 5.2 Text-Bild-Korrelationen — 92
- 5.3 Toposanalyse — 99

|           |                                                                              |            |
|-----------|------------------------------------------------------------------------------|------------|
| 5.4       | Beispielanalyse: Das Schlagwort <i>Idee</i> im Korpusausschnitt —            | <b>107</b> |
| 5.4.1     | Schaffung einer quantitativen Ausgangslage (Schritt 1) —                     | <b>110</b> |
| 5.4.2     | Das Ideen-Konzept im qualitativen Fokus (Schritt 2) —                        | <b>113</b> |
| 5.4.3     | Das Ideen-Konzept in der Fläche (Schritt 3) —                                | <b>123</b> |
| 5.4.4     | Bedeutung des Ideen-Konzepts für den Wissensbereich Kinder und Jugendliche — | <b>126</b> |
| 5.5       | Methodisches Zwischenfazit —                                                 | <b>126</b> |
| <b>6</b>  | <b>Die Kampagnen in der Analyse —</b>                                        | <b>129</b> |
| 6.1       | Die Kampagne DEUTSCHLAND – LAND DER IDEEN —                                  | <b>129</b> |
| 6.1.1     | Dichter und ‚Macher‘ vereint – Programmatisches zur Kampagne —               | <b>129</b> |
| 6.1.2     | Das DEUTSCHLAND – LAND DER IDEEN-Korpus —                                    | <b>133</b> |
| 6.1.3     | Quantitative Grundlage —                                                     | <b>135</b> |
| 6.1.4     | Qualitative Perspektive: Handlungsleitende Konzepte im Fokus —               | <b>139</b> |
| 6.1.4.1   | Das Ideen-Konzept —                                                          | <b>139</b> |
| 6.1.4.2   | Das Zeit-Konzept —                                                           | <b>147</b> |
| 6.1.4.3   | Das Raum-Konzept —                                                           | <b>153</b> |
| 6.1.4.4   | Das Konzept <i>Wissensgesellschaft</i> —                                     | <b>164</b> |
| 6.1.4.5   | Das Konzept <i>Wirtschaft</i> —                                              | <b>177</b> |
| 6.1.4.6   | Das Konzept <i>Politik</i> —                                                 | <b>185</b> |
| 6.1.4.7   | Das Konzept <i>Zivilgesellschaft</i> —                                       | <b>188</b> |
| 6.1.5     | Das Gesellschaftsbild von DEUTSCHLAND – LAND DER IDEEN —                     | <b>206</b> |
| 6.1.5.1   | Das Gemeinwohlverständnis der Kampagne —                                     | <b>206</b> |
| 6.1.5.1.1 | Die Akteursdimension —                                                       | <b>206</b> |
| 6.1.5.1.2 | Die Handlungsdimension —                                                     | <b>207</b> |
| 6.1.5.1.3 | Die Zieldimension —                                                          | <b>208</b> |
| 6.1.5.1.4 | Die Dimension der Art und Weise —                                            | <b>209</b> |
| 6.1.5.1.5 | Die zeitliche Dimension —                                                    | <b>210</b> |
| 6.1.5.1.6 | Die räumliche Dimension —                                                    | <b>210</b> |
| 6.1.5.2   | Akteursrelevanzen und inhaltliche Ausrichtung —                              | <b>212</b> |
| 6.1.5.3   | Argumente in Bewegung – Spannungsfelder in der Kampagne —                    | <b>215</b> |
| 6.1.5.4   | Wiederaufnahme: Besondere Stilistische Beiträge zum Gesellschaftsbild —      | <b>217</b> |
| 6.1.5.5   | DEUTSCHLAND – LAND DER IDEEN – Schlussbetrachtung —                          | <b>224</b> |
| 6.2       | Die Kampagne GEMEINSAM FÜR EIN GUTES LEBEN —                                 | <b>227</b> |
| 6.2.1     | Gerechtigkeit mit Inhalten füllen – Programmatisches zur Kampagne —          | <b>227</b> |

|           |                                                                                    |
|-----------|------------------------------------------------------------------------------------|
| 6.2.2     | Das GEMEINSAM FÜR EIN GUTES LEBEN-Korpus — <b>230</b>                              |
| 6.2.3     | Quantitative Grundlage — <b>232</b>                                                |
| 6.2.4     | Qualitative Perspektive: Handlungsleitende Konzepte im Fokus — <b>236</b>          |
| 6.2.4.1   | Das Konzept <i>Leben</i> — <b>236</b>                                              |
| 6.2.4.2   | Das Konzept <i>Arbeit</i> — <b>241</b>                                             |
| 6.2.4.3   | Das Konzept <i>Zivilgesellschaft</i> — <b>249</b>                                  |
| 6.2.4.4   | Das Konzept <i>Politik</i> — <b>262</b>                                            |
| 6.2.4.5   | Das Konzept <i>Wirtschaft</i> — <b>268</b>                                         |
| 6.2.4.6   | Das Konzept <i>IG Metall</i> — <b>275</b>                                          |
| 6.2.4.7   | Das Konzept <i>Zeit</i> — <b>283</b>                                               |
| 6.2.4.8   | Das Konzept <i>Raum</i> — <b>288</b>                                               |
| 6.2.5     | Das Gesellschaftsbild der Kampagne GEMEINSAM FÜR EIN GUTES LEBEN — <b>292</b>      |
| 6.2.5.1   | Das Gemeinwohlverständnis — <b>293</b>                                             |
| 6.2.5.1.1 | Die Akteursdimension — <b>293</b>                                                  |
| 6.2.5.1.2 | Die Handlungsdimension — <b>294</b>                                                |
| 6.2.5.1.3 | Die Zieldimension — <b>294</b>                                                     |
| 6.2.5.1.4 | Die Dimension der Art und Weise — <b>295</b>                                       |
| 6.2.5.1.5 | Die zeitliche Dimension — <b>295</b>                                               |
| 6.2.5.1.6 | Die räumliche Dimension — <b>295</b>                                               |
| 6.2.5.2   | Akteursrelevanzen und inhaltliche Ausrichtung — <b>297</b>                         |
| 6.2.5.3   | Argumente in Bewegung – Spannungsfelder in der Kampagne — <b>300</b>               |
| 6.2.5.4   | Wiederaufnahme: Besondere Stilistische Beiträge zum Gesellschaftsbild — <b>302</b> |
| 6.2.6     | GEMEINSAM FÜR EIN GUTES LEBEN – Schlussbetrachtung — <b>307</b>                    |
| 6.3       | Die Kampagne DIE GESELLSCHAFTER.DE — <b>309</b>                                    |
| 6.3.1     | Dem Neoliberalismus die Stirn bieten – Programmatik zur Kampagne — <b>309</b>      |
| 6.3.2     | Das DIE GESELLSCHAFTER.DE-Korpus — <b>311</b>                                      |
| 6.3.3     | Quantitative Grundlage — <b>313</b>                                                |
| 6.3.4     | Qualitative Perspektive: Handlungsleitende Konzepte im Fokus — <b>316</b>          |
| 6.3.4.1   | Das Konzept <i>Gesellschaft</i> — <b>316</b>                                       |
| 6.3.4.2   | Das Konzept <i>Leben</i> — <b>324</b>                                              |
| 6.3.4.3   | Das Konzept <i>Zivilgesellschaft</i> — <b>332</b>                                  |
| 6.3.4.4   | Das Konzept <i>Politik</i> — <b>340</b>                                            |
| 6.3.4.5   | Das Konzept <i>Wirtschaft</i> — <b>345</b>                                         |
| 6.3.4.6   | Das Konzept <i>Zeit</i> — <b>350</b>                                               |

|           |                                                                                   |            |
|-----------|-----------------------------------------------------------------------------------|------------|
| 6.3.4.7   | Das Konzept <i>Raum</i> —                                                         | <b>353</b> |
| 6.3.5     | Das Gesellschaftsbild der Kampagne DIE GESELLSCHAFTER.DE —                        | <b>358</b> |
| 6.3.6     | Das Gemeinwohlverständnis —                                                       | <b>358</b> |
| 6.3.6.1.1 | Die Akteursdimension —                                                            | <b>359</b> |
| 6.3.6.1.2 | Die Handlungsdimension —                                                          | <b>360</b> |
| 6.3.6.1.3 | Die Zieldimension —                                                               | <b>360</b> |
| 6.3.6.1.4 | Die Dimension der Art und Weise —                                                 | <b>360</b> |
| 6.3.6.1.5 | Die zeitliche Dimension —                                                         | <b>361</b> |
| 6.3.6.1.6 | Die räumliche Dimension —                                                         | <b>361</b> |
| 6.3.6.2   | Akteursrelevanzen und inhaltliche Ausrichtung —                                   | <b>363</b> |
| 6.3.6.3   | Argumente in Bewegung – Spannungsfelder in der<br>Kampagne —                      | <b>365</b> |
| 6.3.6.4   | Wiederaufnahme: Besondere Stilistische Beiträge zum<br>Gesellschaftsbild —        | <b>367</b> |
| 6.3.7     | Das soziale Herz schlägt in der Zivilgesellschaft –<br>Schlussbetrachtung —       | <b>370</b> |
| <b>7</b>  | <b>Gemeinsame Kerne und antagonistische Splitter von<br/>Gemeinwohlidealien —</b> | <b>373</b> |
| 7.1       | Die Akteursdimension —                                                            | <b>374</b> |
| 7.1.1     | Das Individuum —                                                                  | <b>375</b> |
| 7.1.2     | Die Zivilgesellschaft —                                                           | <b>381</b> |
| 7.1.3     | Die Wirtschaft —                                                                  | <b>384</b> |
| 7.1.4     | Die Politik —                                                                     | <b>388</b> |
| 7.1.5     | Akteure des Gemeinwohls – Fazit —                                                 | <b>391</b> |
| 7.2       | Die Ziel- und die Handlungsdimension —                                            | <b>395</b> |
| 7.3       | Die Dimension der Art und Weise —                                                 | <b>401</b> |
| 7.4       | Die zeitliche Dimension —                                                         | <b>402</b> |
| 7.5       | Die räumliche Dimension —                                                         | <b>406</b> |
| 7.6       | Gemeinwohlideale unter Spannung – eine<br>Zusammenschau —                         | <b>408</b> |
| 7.6.1     | Gegebenheit versus Gestaltbarkeit von Gesellschaft —                              | <b>410</b> |
| 7.6.2     | Vulnerabilität versus Selbstbehauptung —                                          | <b>411</b> |
| 7.6.3     | Subjektive Erfüllung versus kollektive Verantwortung —                            | <b>412</b> |
| 7.6.4     | Ökonomisierung versus Postmaterialismus —                                         | <b>413</b> |
| 7.6.5     | Feindseligkeit versus Freundschaft —                                              | <b>414</b> |
| 7.6.6     | Furcht versus Zuversicht —                                                        | <b>416</b> |
| 7.6.7     | Spannungsfeld der Gemeinwohllakteure —                                            | <b>417</b> |
| 7.6.8     | Zeitliches Spannungsfeld —                                                        | <b>419</b> |
| 7.6.9     | Räumliches Spannungsfeld —                                                        | <b>420</b> |

|           |                                                                  |            |
|-----------|------------------------------------------------------------------|------------|
| 7.7       | Die Gesellschaftsbilder der Kampagnen – Zwischenfazit —          | 421        |
| <b>8</b>  | <b>Deutungsvarianten von Gesellschaftswirklichkeit —</b>         | <b>425</b> |
| 8.1       | Unüberwindbare Gegensätze und Ausgleichsbemühungen —             | 428        |
| 8.2       | Ideologische Gratwanderungen —                                   | 431        |
| 8.3       | Worüber wir reden müssen, wenn wir über uns selbst reden —       | 433        |
| <b>9</b>  | <b>Kampagne revisited – Neue Aspekte auf empirischer Basis —</b> | <b>437</b> |
| 9.1       | Linguistische Kampagnenanalyse – Warum überhaupt? —              | 437        |
| 9.2       | Zur linguistischen Kampagnendefinition —                         | 439        |
| 9.3       | Sprachliche Besonderheiten von Kampagnen —                       | 441        |
| 9.3.1     | Schlagwörter —                                                   | 442        |
| 9.3.2     | Positiv- und Negativ-Fokussierungen —                            | 444        |
| 9.3.3     | Konstruktionen kollektiver Identität —                           | 444        |
| 9.3.4     | Raum-Zeit-Gefüge —                                               | 445        |
| 9.3.5     | Freund-Feind-Gefüge —                                            | 446        |
| 9.3.6     | Vagheiten —                                                      | 447        |
| 9.3.7     | Argumentation in Spannungsfeldern —                              | 448        |
| <b>10</b> | <b>Fazit —</b>                                                   | <b>451</b> |
| <b>11</b> | <b>Schlussbemerkung —</b>                                        | <b>457</b> |
|           | <b>Literaturverzeichnis —</b>                                    | <b>459</b> |
